# Supplementary material
Source: Springer Nature journal article supplement (https://www.springermedizin.de/resource/supplementary/12873_2012_155_MOESM3_ESM.pdf/9431514)

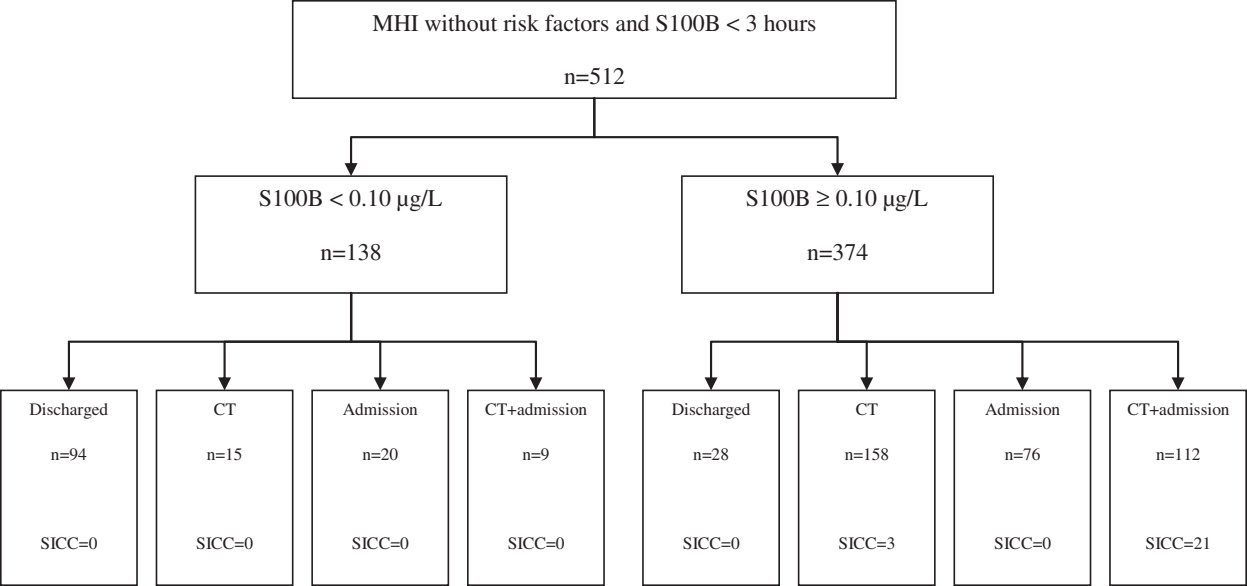

Supplement: MOESM3 [file 9431514]
